# Supplementary material for: DNA from the Past Informs Ex Situ Conservation for the Future: An “Extinct” Species of Galápagos Tortoise Identified in Captivity
Source: PLoS One. 2010 Jan 13;5(1):e8683. doi: 10.1371/journal.pone.0008683 (PMC2800188; doi:10.1371/journal.pone.0008683)
Supplement: Table S1 — Lineage identification of captive Galápagos tortoises of unknown ancestry based on mtDNA and microsatellite data. Individuals are listed according to the ex situ collection in which they currently reside with acronyms as in “Materials and Methods” in the text. Unknown tortoises are assigned to a population of origin based on the location of a shared mtDNA haplotype previously sampled in the wild with corresponding GenBank accession numbers. Individuals possessing a “non-native” haplotype originally sampled on northern Isabela in Puerto Bravo (PBR) or Piedras Blancas (PBL) indicated by *. Other population and island locations are specified by acronyms as in Figure 1. Population and island assignment according to the microsatellite genotypic data and the tests of Rannala and Mountain (1997) and Pritchard et al. (2000) are indicated by their corresponding likelihood values (L1 & L2) and membership coefficients (q), respectively. (0.08 MB XLS) [file pone.0008683.s001.xls]

## Sheet: TableS1
		Mitochondrial DNA control region							Microsatellite multi-locus genotypes
						Pritchard et al. (2000)					Rannala and Mountain (1997)
#	Haplotype	Population	Island	GENBANK		Population	Island	q		Population	Island	L1	Population	Island	L2
CABG001	54	CAZ	Isabela	AF548257		CRU	Santa Cruz	0.653		CRU	Santa Cruz	18.668	VA	Isabela	20.681
CABG004	52	PBL	Isabela	AF548255		LC	Isabela	0.65		FLO	Floreana	14.705	PBL	Isabela	16.698
CABG005	88	CRU	Santa Cruz	AY268588		CRU	Santa Cruz	0.724		PBL	Isabela	22.168	CRU	Santa Cruz	24.059
CABG006	88	CRU	Santa Cruz	AY268588		LC	Isabela	0.497		LC	Isabela	19.322	CRU	Santa Cruz	19.878
CABG007	88	CRU	Santa Cruz	AY268588		CRU	Santa Cruz	0.502		CRU	Santa Cruz	18.403	VA	Isabela	23.433
CABG009	55	CAZ	Isabela	AF548258		CAZ	Isabela	0.629		RU	Isabela	17.586	CAZ	Isabela	18.158
CABG010	61	VA	Isabela	AF548264		LT	Isabela	0.341		RU	Isabela	17.521	LP	Isabela	18.662
CABG011	54	CAZ	Isabela	AF548257		VD	Isabela	0.388		VD	Isabela	16.981	CRU	Santa Cruz	18.842
CABG012	54	CAZ	Isabela	GQ220697		CAZ	Isabela	0.916		VA	Isabela	16.867	CAZ	Isabela	17.71
CABG013	55	CAZ	Isabela	AF548258		CAZ	Isabela	0.494		VD	Isabela	21.052	RU	Isabela	22.772
CABG014	61	VA	Isabela	AF548264		VA	Isabela	0.87		VA	Isabela	11.527	VD	Isabela	19.322
CABG015	54	CAZ	Isabela	AF548257		CAZ	Isabela	0.82		CAZ	Isabela	12.956	RU	Isabela	16.138
CABG018	54	CAZ	Isabela	AF548257		CAZ	Isabela	0.352		CR	Isabela	20.322	CAZ	Isabela	20.457
CABG019	54	CAZ	Isabela	AF548257		LC	Isabela	0.289		LC	Isabela	19.279	RU	Isabela	20.108
CABG021	54	CAZ	Isabela	AF548257		CAZ	Isabela	0.482		PBR	Isabela	21.909	PBL	Isabela	22.398
CABG023	88	CRU	Santa Cruz	AY268588		CAZ	Isabela	0.872		VD	Isabela	21.487	CAZ	Isabela	22.491
CABG024	87	CRU	Santa Cruz	GQ220698		CRU	Santa Cruz	0.312		RU	Isabela	21.297	CAZ	Isabela	21.408
CABG025	88	CRU	Santa Cruz	AY268588		CAZ	Isabela	0.91		LC	Isabela	22.963	CRU	Santa Cruz	23.405
CABG027	61	VA	Isabela	AF548264		VA	Isabela	0.354		VD	Isabela	17.927	VA	Isabela	18.7
CABG028	88	CRU	Santa Cruz	AY268588		CAZ	Isabela	0.91		CRU	Santa Cruz	23.424	VA	Isabela	23.796
CABG029	87	CRU	Santa Cruz	GQ220698		CRU	Santa Cruz	0.237		RU	Isabela	14.762	VA	Isabela	16.169
CABG030	88	CRU	Santa Cruz	AY268588		CAZ	Isabela	0.906		PBL	Isabela	8.603	LP	Isabela	9.634
CABG031	54	CAZ	Isabela	AF548257		CAZ	Isabela	0.273		PBL	Isabela	7.899	LC	Isabela	11.017
CABG296	52	PBL	Isabela	AF548255		PBL	Isabela	0.908		VA	Isabela	17.764	CAZ	Isabela	18.058
CABG297	52	PBL	Isabela	AF548255		PBL	Isabela	0.925		CR	Isabela	13.719	VA	Isabela	15.11
CDRS001	54	CAZ	Isabela	AF548257		CAZ	Isabela	0.442		CAZ	Isabela	11.48	RU	Isabela	11.895
CDRS002	54	CAZ	Isabela	AF548257		VA	Isabela	0.573		VA	Isabela	9.727	CAZ	Isabela	11.595
CDRS003	52	PBL	Isabela	AF548255		SCR	San Cristóbal	0.947		CRU	Santa Cruz	21.332	SCR	San Cristóbal	21.915
CDRS004	52	PBL	Isabela	AF548255		LT	Isabela	0.539		PBL	Isabela	10.718	LT	Isabela	10.761
CDRS005	61	VA/CAZ/LC	Isabela	AF548264		CAZ	Isabela	0.374		VD	Isabela	18.731	RU	Isabela	23.015
CDRS006	52	PBL	Isabela	AF548255		PBL	Isabela	0.331		PBL	Isabela	18.782	CRU	Santa Cruz	25.811
CDRS007	52	PBL	Isabela	AF548255		SCR	San Cristóbal	0.941		CRU	Santa Cruz	18.549	PBL	Isabela	24.145
CDRS008	52	PBL	Isabela	AF548255		SCR	San Cristóbal	0.867		FLO	Floreana	20.493	PBL	Isabela	20.695
CDRS009	57	RU/CR	Isabela	AF548260		CR	Isabela	0.913		LC	Isabela	8.412	CR	Isabela	8.749
CDRS010	52	PBL	Isabela	AF548255		SCR	San Cristóbal	0.919		FLO	Floreana	14.893	CR	Isabela	16.458
CDRS011	52	PBL	Isabela	AF548255		SCR	San Cristóbal	0.944		FLO	Floreana	24.328	CRU	Santa Cruz	24.707
CDRS012	52	PBL	Isabela	AF548255		SCR	San Cristóbal	0.912		CRU	Santa Cruz	25.926	PBL	Isabela	26.397
CDRS013	52	PBL	Isabela	AF548255		SCR	San Cristóbal	0.932		SCR	San Cristóbal	17.545	CRU	Santa Cruz	17.621
CDRS014	52	PBL	Isabela	AF548255		SCR	San Cristóbal	0.95		FLO	Floreana	24.451	PBL	Isabela	25.568
CDRS015	84	VA/CAZ/RU	Isabela	AY267214		CR	Isabela	0.194		VD	Isabela	15.405	VA	Isabela	15.574
CDRS016	57	RU/CR	Isabela	AF548260		CR	Isabela	0.831		CR	Isabela	12.327	PBL	Isabela	13.74
CDRS017	78	PBR*	Isabela	AF548281		FLO	Floreana	0.879		FLO	Floreana	22.2	PBL	Isabela	22.346
CDRS018	52	PBL	Isabela	AF548255		SCR	San Cristóbal	0.805		PBL	Isabela	19.991	FLO	Floreana	22.943
CDRS019	54	CAZ	Isabela	AF548257		CAZ	Isabela	0.524		CR	Isabela	19.3	CAZ	Isabela	19.524
CDRS021	52	PBL	Isabela	AF548255		SCR	San Cristóbal	0.946		FLO	Floreana	24.082	PBL	Isabela	25.211
CDRS022	86	CRU	Santa Cruz	AY268586		CRU	Santa Cruz	0.565		CRU	Santa Cruz	25.279	PBR	Isabela	28.833
CDRS023	57	RU/CR	Isabela	AF548260		CR	Isabela	0.898		CR	Isabela	9.271	LC	Isabela	11.013
CDRS024	52	PBL	Isabela	AF548255		SCR	San Cristóbal	0.931		PBL	Isabela	19.049	FLO	Floreana	19.744
CDRS025	52	PBL	Isabela	AF548255		SCR	San Cristóbal	0.952		CRU	Santa Cruz	22.97	PBL	Isabela	25.068
CDRS026	52	PBL	Isabela	AF548255		SCR	San Cristóbal	0.93		FLO	Floreana	21.147	CRU	Santa Cruz	22.214
CDRS027	18	CRU	Santa Cruz	AF548221		CRU	Santa Cruz	0.816		CR	Isabela	16.517	LC	Isabela	16.815
CDRS028	52	PBL	Isabela	AF548255		SCR	San Cristóbal	0.955		CRU	Santa Cruz	22.544	FLO	Floreana	25.265
CDRS029	78	PBR*	Isabela	AF548281		FLO	Floreana	0.544		PBL	Isabela	25.827	LT	Isabela	30.003
CDRS030	57	RU/CR	Isabela	AF548260		CR	Isabela	0.838		CR	Isabela	8.787	RU	Isabela	9.578
CDRS031	57	RU/CR	Isabela	AF548260		CR	Isabela	0.717		LC	Isabela	14.586	LT	Isabela	16.747
CDRS032	78	PBR*	Isabela	AF548281		FLO	Floreana	0.798		PBL	Isabela	20.454	FLO	Floreana	21.788
CDRS033	85	CRU	Santa Cruz	AY268585		CRU	Santa Cruz	0.78		CRU	Santa Cruz	17.644	LT	Isabela	21.072
CDRS034	52	PBL	Isabela	AF548255		SCR	San Cristóbal	0.903		PBL	Isabela	24.152	FLO	Floreana	24.251
CDRS035	52	PBL	Isabela	AF548255		SCR	San Cristóbal	0.916		PBL	Isabela	21.649	FLO	Floreana	21.867
CDRS036	52	PBL	Isabela	AF548255		PBL	Isabela	0.341		PBL	Isabela	14.13	PBR	Isabela	17.699
CDRS037	3	SCR	San Cristóbal	AF548206		SCR	San Cristóbal	0.522		SCR	San Cristóbal	12.665	FLO	Floreana	15.18
CDRS038	75	PBL*	Isabela	AF548278		AGO	Santiago	0.469		PBL	Isabela	17.902	CRU	Santa Cruz	18.428
CDRS039	76	PBL*	Isabela	AF548279		SCR	San Cristóbal	0.601		FLO	Floreana	19.907	PBL	Isabela	22.412
CDRS040	78	PBR*	Isabela	AF548281		FLO	Floreana	0.94		FLO	Floreana	20.634	LT	Isabela	25.395
CDRS041	86	CRU	Santa Cruz	AY268586		CRU	Santa Cruz	0.846		CRU	Santa Cruz	13.669	LT	Isabela	19.279
CDRS042	78	PBR*	Isabela	AF548281		FLO	Floreana	0.909		FLO	Floreana	18.256	AGO	Santiago	22.663
CDRS043	78	PBR*	Isabela	AF548281		FLO	Floreana	0.923		FLO	Floreana	23.585	PNT	Pinta	28.137
CDRS044	78	PBR*	Isabela	AF548281		FLO	Floreana	0.93		FLO	Floreana	22.219	ESP	Española	26.901
CDRS045	52	PBL	Isabela	AF548255		SCR	San Cristóbal	0.935		FLO	Floreana	21.443	PBL	Isabela	21.952
CDRS046	52	PBL	Isabela	AF548255		PBL	Isabela	0.772		PBL	Isabela	14.992	CRU	Santa Cruz	19.679
CDRS047	83	PBR*	Isabela	AF548286		FLO	Floreana	0.942		FLO	Floreana	21.985	PBR	Isabela	28.657
CDRS048	52	PBL	Isabela	AF548255		LT	Isabela	0.302		PBL	Isabela	18.319	CRU	Santa Cruz	19.37
CDRS049	52	PBL	Isabela	AF548255		PBL	Isabela	0.772		PBL	Isabela	14.528	FLO	Floreana	21.773
CDRS050	54	CAZ	Isabela	AF548257		CAZ	Isabela	0.856		CAZ	Isabela	10.463	VA	Isabela	13.089
CDRS051	34	LT/LP	Isabela	AF548237		CR	Isabela	0.583		LC	Isabela	14.331	LT	Isabela	15.014
CDRS053	54	CAZ	Isabela	AF548257		VA	Isabela	0.492		VA	Isabela	20.272	LC	Isabela	22.102
CDRS055	87	CRU	Santa Cruz	AY268587		CRU	Santa Cruz	0.743		CRU	Santa Cruz	12.15	PBL	Isabela	12.598
CDRS056	88	CRU	Santa Cruz	AY268588		CRU	Santa Cruz	0.888		CRU	Santa Cruz	11.469	AGO	Santiago	16.481
CDRS057	52	PBL	Isabela	AF548255		AGO	Santiago	0.429		PBL	Isabela	12.875	PBR	Isabela	14.684
CDRS058	14	CRU	Santa Cruz	AF548217		CRU	Santa Cruz	0.732		CRU	Santa Cruz	17.105	LC	Isabela	25.675
CDRS059	27	VD	Isabela	AF548230		VD	Isabela	0.94		VD	Isabela	8.756	CAZ	Isabela	15.978
CDRS060	52	PBL	Isabela	AF548255		PBL	Isabela	0.445		PBL	Isabela	14.679	LT	Isabela	21.237
CDRS061	86	CRU	Santa Cruz	AY268586		CRU	Santa Cruz	0.921		CRU	Santa Cruz	9.105	LT	Isabela	16.497
CDRS106	78	PBR*	Isabela	AF548281		FLO	Floreana	0.914		FLO	Floreana	22.21	ESP	Española	28.36
CDRS107	78	PBR*	Isabela	AF548281		FLO	Floreana	0.859		FLO	Floreana	20.419	PBL	Isabela	25.743
ECU01	88	CRU	Santa Cruz	AY268588		CRU	Santa Cruz	0.67		CRU	Santa Cruz	14.954	PBL	Isabela	17.316
ECU02	88	CRU	Santa Cruz	AY268588		CRU	Santa Cruz	0.844		CRU	Santa Cruz	13.774	LC	Isabela	15.602
ECU03	55	CAZ	Isabela	AF548258		CAZ	Isabela	0.283		LT	Isabela	17.279	VA	Isabela	17.589
ECU04	88	CRU	Santa Cruz	AY268588		CRU	Santa Cruz	0.907		CRU	Santa Cruz	12.48	LC	Isabela	19.085
ECU05	88	CRU	Santa Cruz	AY268588		CRU	Santa Cruz	0.787		LC	Isabela	16.698	CRU	Santa Cruz	17.134
ECU06	14	CRU	Santa Cruz	AF548217		CRU	Santa Cruz	0.449		CRU	Santa Cruz	15.37	LC	Isabela	18.522
ECU07	52	PBL	Isabela	AF548255		PBL	Isabela	0.473		PBL	Isabela	11.595	PBR	Isabela	21.729
ECU08	61	VA	Isabela	AF548264		RU	Isabela	0.503		VA	Isabela	12.839	RU	Isabela	12.958
ECU09	55	CAZ	Isabela	AF548258		CAZ	Isabela	0.791		CAZ	Isabela	18.774	RU	Isabela	23.395
ECU10	28	VD	Isabela	AF548231		VD	Isabela	0.882		VD	Isabela	10.052	VA	Isabela	15.714
ECU11	14	CRU	Santa Cruz	AF548217		CRU	Santa Cruz	0.907		CRU	Santa Cruz	10.1	CF	Santa Cruz	17.054
ECU12	25	PBR	Isabela	AF548228		PBR	Isabela	0.907		PBR	Isabela	10.443	PBL	Isabela	14.1
ECU13	61	VA	Isabela	AF548264		LT	Isabela	0.52		LT	Isabela	15.538	LP	Isabela	16.03
ECU14	54	CAZ	Isabela	AF548257		VA	Isabela	0.536		VA	Isabela	13.029	VD	Isabela	17.818
ECU15	78	PBR*	Isabela	AF548281		FLO	Floreana	0.803		PBR	Isabela	23.602	PBL	Isabela	26.038
ECU16	15	CRU	Santa Cruz	AF548218		CR	Isabela	0.613		CR	Isabela	21.007	VD	Isabela	21.013
ECU17	86	CRU	Santa Cruz	AY268586		CRU	Santa Cruz	0.888		CRU	Santa Cruz	12.774	CF	Santa Cruz	17.192
ECU18	88	CRU	Santa Cruz	AY268588		CRU	Santa Cruz	0.57		CRU	Santa Cruz	14.251	RU	Isabela	16.147
ECU19	27	VD	Isabela	AF548231		VD	Isabela	0.932		VD	Isabela	7.487	CAZ	Isabela	13.529
ECU20	14	CRU	Santa Cruz	AF548217		CRU	Santa Cruz	0.793		CRU	Santa Cruz	12.959	PBL	Isabela	17.949
ECU21	61	VA	Isabela	AF548264		CAZ	Isabela	0.324		VD	Isabela	18.253	LT	Isabela	19.438
ECU22	61	VA	Isabela	AF548264		VA	Isabela	0.186		CR	Isabela	17.643	CAZ	Isabela	18.452
ECU23	52	PBL	Isabela	AF548255		LC	Isabela	0.7		PBL	Isabela	16.282	PBR	Isabela	22.19
ECU24	61	VA	Isabela	AF548264		CAZ	Isabela	0.384		RU	Isabela	14.196	CAZ	Isabela	16.517
ECU25	61	VA	Isabela	AF548264		LC	Isabela	0.747		PBL	Isabela	17.337	LT	Isabela	17.966
ECU26	55	CAZ	Isabela	GQ220699		CAZ	Isabela	0.842		CAZ	Isabela	14.304	LT	Isabela	17.88
ECU27	61	VA	Isabela	AF548264		LC	Isabela	0.39		PBL	Isabela	13.972	RU	Isabela	19.562
ECU28	21	CRU	Santa Cruz	GQ220700		CRU	Santa Cruz	0.901		CRU	Santa Cruz	12.963	LC	Isabela	19.577
ECU29	52	PBL	Isabela	AF548255		PBL	Isabela	0.317		PBL	Isabela	14.151	LC	Isabela	18.523
PRZ01	8	PZN	Pinzón	AF548211		PZN	Pinzón	0.929		PZN	Pinzón	11.403	PBL	Isabela	21.785
PRZ02	88	CRU	Santa Cruz	GQ220701		CRU	Santa Cruz	0.9		CRU	Santa Cruz	20.687	PBL	Isabela	25.691
SDZ01	52	PBL	Isabela	AF548255		PBL	Isabela	0.652		PBL	Isabela	14.592	CRU	Santa Cruz	23.698
SDZ02	24	LP	Isabela	AF548237		CAZ	Isabela	0.823		VA	Isabela	15.901	RU	Isabela	16.525
SDZ03	55	CAZ	Isabela	AF548258		LT	Isabela	0.44		LT	Isabela	17.816	LP	Isabela	19.07
SDZ04	27	VD	Isabela	AF548230		VD	Isabela	0.948		VD	Isabela	10.444	CR	Isabela	21.04
SDZ05	55	CAZ	Isabela	AF548258		VA	Isabela	0.47		VA	Isabela	18.773	LC	Isabela	21.863
SDZ06	54	CAZ	Isabela	AF548257		CAZ	Isabela	0.662		RU	Isabela	20.155	VD	Isabela	20.739
SDZ07	61	VA	Isabela	AF548264		VA	Isabela	0.338		VD	Isabela	22.201	VA	Isabela	22.331
WCF01	86	CRU	Santa Cruz	AY268586		PBL	Isabela	0.95		PBL	Isabela	19.622	CRU	Santa Cruz	20.46
WCF02	86	CRU	Santa Cruz	AY268586		PBL	Isabela	0.563		FLO	Floreana	20.074	PBL	Isabela	21.993
WCF03	88	CRU	Santa Cruz	AY268588		PBL	Isabela	0.951		CRU	Santa Cruz	18.357	PBL	Isabela	18.949
WCF04	88	CRU	Santa Cruz	AY268588		PBL	Isabela	0.953		CRU	Santa Cruz	20.265	PBL	Isabela	21.14
WCF05	86	CRU	Santa Cruz	AY268586		PBL	Isabela	0.955		CRU	Santa Cruz	18.283	PBL	Isabela	18.995
WCF06	86	CRU	Santa Cruz	AY268586		PBL	Isabela	0.949		PBL	Isabela	17.452	CRU	Santa Cruz	18.776
WCF07	86	CRU	Santa Cruz	AY268586		PBL	Isabela	0.953		CRU	Santa Cruz	18.944	PBL	Isabela	19.088
WCF08	88	CRU	Santa Cruz	AY268588		PBL	Isabela	0.93		PBL	Isabela	13.742	CRU	Santa Cruz	13.828
WCF09	86	CRU	Santa Cruz	AY268586		PBL	Isabela	0.952		PBL	Isabela	19.679	CRU	Santa Cruz	21.907
WCF10	86	CRU	Santa Cruz	AY268586		PBL	Isabela	0.601		PBL	Isabela	22.462	CRU	Santa Cruz	27.075
WCF11	86	CRU	Santa Cruz	AY268586		PBL	Isabela	0.95		PBL	Isabela	16.92	CRU	Santa Cruz	17.9
WCF12	86	CRU	Santa Cruz	AY268586		PBL	Isabela	0.504		FLO	Floreana	21.489	PBL	Isabela	23.885
WCF13	86	CRU	Santa Cruz	AY268586		PBL	Isabela	0.95		PBL	Isabela	18.486	CRU	Santa Cruz	18.81
WCF14	86	CRU	Santa Cruz	AY268586		PBL	Isabela	0.951		PBL	Isabela	17.789	CRU	Santa Cruz	21.875
WCF15	86	CRU	Santa Cruz	AY268586		PBL	Isabela	0.926		CRU	Santa Cruz	10.82	PBL	Isabela	23.208
WCF16	28	VD	Isabela	AF548231		VD	Isabela	0.938		VD	Isabela	9.269	VA	Isabela	14.842
WCF17	86	CRU	Santa Cruz	AY268586		PBL	Isabela	0.943		PBL	Isabela	15.918	CRU	Santa Cruz	16.749
WCF18	86	CRU	Santa Cruz	AY268586		PBL	Isabela	0.961		PBL	Isabela	14.567	FLO	Floreana	21.707
WCF19	52	PBL	Isabela	AF548255		PBL	Isabela	0.946		PBL	Isabela	15.764	CRU	Santa Cruz	18.682
WCF20	86	CRU	Santa Cruz	AY268586		PBL	Isabela	0.954		PBL	Isabela	17.08	CRU	Santa Cruz	21.874
WCF21	86	CRU	Santa Cruz	AY268586		PBL	Isabela	0.94		PBL	Isabela	13.075	CRU	Santa Cruz	13.64
WCF22	86	CRU	Santa Cruz	AY268586		PBL	Isabela	0.955		PBL	Isabela	18.968	CRU	Santa Cruz	21.54
WCF23	86	CRU	Santa Cruz	AY268586		PBL	Isabela	0.951		PBL	Isabela	16.945	CRU	Santa Cruz	20.578
WCF24	86	CRU	Santa Cruz	AY268586		PBL	Isabela	0.944		PBL	Isabela	15.165	CRU	Santa Cruz	15.992
WCF25	86	CRU	Santa Cruz	AY268586		PBL	Isabela	0.953		PBL	Isabela	18.203	CRU	Santa Cruz	21.092
WCF26	52	PBL	Isabela	AF548255		PBL	Isabela	0.952		CRU	Santa Cruz	18.521	PBL	Isabela	20.992
WCF27	86	CRU	Santa Cruz	AY268586		PBL	Isabela	0.953		PBL	Isabela	17.667	CRU	Santa Cruz	21.909
WCF28	86	CRU	Santa Cruz	AY268586		PBL	Isabela	0.946		CRU	Santa Cruz	18.439	LC	Isabela	19.688
WCF29	86	CRU	Santa Cruz	AY268586		PBL	Isabela	0.605		PBL	Isabela	12.906	PBR	Isabela	19.911
ZUZ01	18	CRU	Santa Cruz	GQ220702		CRU	Santa Cruz	0.796		CRU	Santa Cruz	15.657	PBL	Isabela	20.657
ZUZ10	52	PBL	Isabela	AF548255		PBL	Isabela	0.33		PBL	Isabela	14.072	LC	Isabela	19.945
ZUZ20	52	PBL	Isabela	AF548255		AGO	Santiago	0.693		PBL	Isabela	12.949	AGO	Santiago	13.478
ZUZ30	61	VA	Isabela	AF548264		CR	Isabela	0.47		VD	Isabela	14.656	CR	Isabela	17.976
